# Supplementary material for: Electronic nano sponge breath ammonia sensors using hygroscopic polymers on vertical channel nano-porous structure
Source: Royal Society of Chemistry journal article supplement (doi:10.1039/d1tc01607e), 2021-01-01
Supplement: d1tc01607e1.pdf [file d1tc01607e1.pdf]

## Supporting Information

### **Electronic Nano Sponge Breath Ammonia Sensors by Using Hygroscopic Polymers on Vertical Channel Nano-Porous Structure**

*Wei-Lun Chen,<sup>a</sup> Huang-Cheng Chiu,<sup>a</sup> Hsuan Chu,<sup>a</sup> Ju-Chun Hsieh,<sup>b,c</sup> Bing-Xin Chen,<sup>b,c</sup> Ya-Chun Tian,<sup>d,e</sup> Shuh-Kuan Liao,<sup>e</sup> Ming-Jen Chan,<sup>e</sup> Chia-Jung Lu,<sup>f</sup> Hsin-Fei Meng,<sup>g,h</sup> Sheng-Fu Horng,<sup>a,\*</sup> Chien-Lung Wang,<sup>i,j,\*</sup> Hsiao-Wen Zan<sup>b,c,\*</sup>*

Wei-Lun Chen and Huang-Cheng Chiu contributed equally to this work.

<sup>a</sup> Institute of Electronics Engineering, National Tsing Hua University, No. 101, Section 2, Guangfu Road, 300 Hsinchu, Taiwan.

<sup>b</sup> Department of Photonics, College of Electrical and Computer Engineering, National Chiao Tung University, No. 1001, Ta Hsueh Road, 300 Hsinchu, Taiwan.

<sup>c</sup> Department of Photonics, College of Electrical and Computer Engineering, National Yang Ming Chiao Tung University, No. 1001, Ta Hsueh Road, 300 Hsinchu, Taiwan.

<sup>d</sup> Department of Medicine, Chang Gung University, No.259, Wenhua 1st Rd., Guishan Dist., 333 Taoyuan, Taiwan.

<sup>e</sup> Kidney Research Center and Department of Nephrology, Linkou Chang Gung Memorial Hospital, No.5, Fuxing St., Guishan Dist., 333 Taoyuan, Taiwan.

<sup>f</sup> Department of Chemistry, National Taiwan Normal University, 162, Heping East Road, Section 1, 106 Taipei, Taiwan.

<sup>g</sup> Institute of Physics, National Chiao Tung University, No. 1001, Ta Hsueh Road, 300 Hsinchu, Taiwan.

<sup>h</sup> Institute of Physics, National Yang Ming Chiao Tung University, No. 1001, Ta Hsueh Road, 300 Hsinchu, Taiwan.

<sup>i</sup> Department of Applied Chemistry, National Chiao Tung University, 300 Hsinchu, Taiwan.

<sup>j</sup> Department of Applied Chemistry, National Yang Ming Chiao Tung University, 300 Hsinchu, Taiwan.

### **Corresponding Author**

\*Email: [sfhorng@ee.nthu.edu.tw](mailto:sfhorng@ee.nthu.edu.tw)

\*E-mail: [kclwang@g2.nctu.edu.tw](mailto:kclwang@g2.nctu.edu.tw)

\*E-mail: [hsiaowen@nycu.edu.tw](mailto:hsiaowen@nycu.edu.tw)

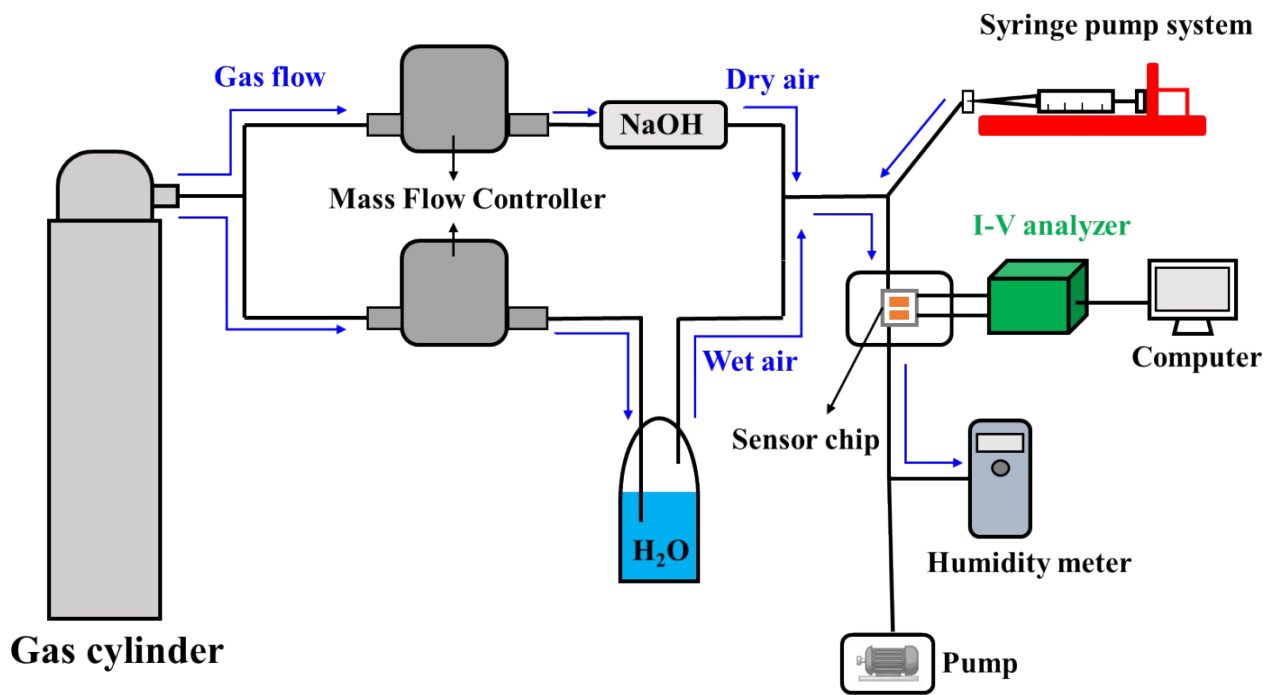

**Figure S1.** The gas sensing system with the humidity modulation set-up.

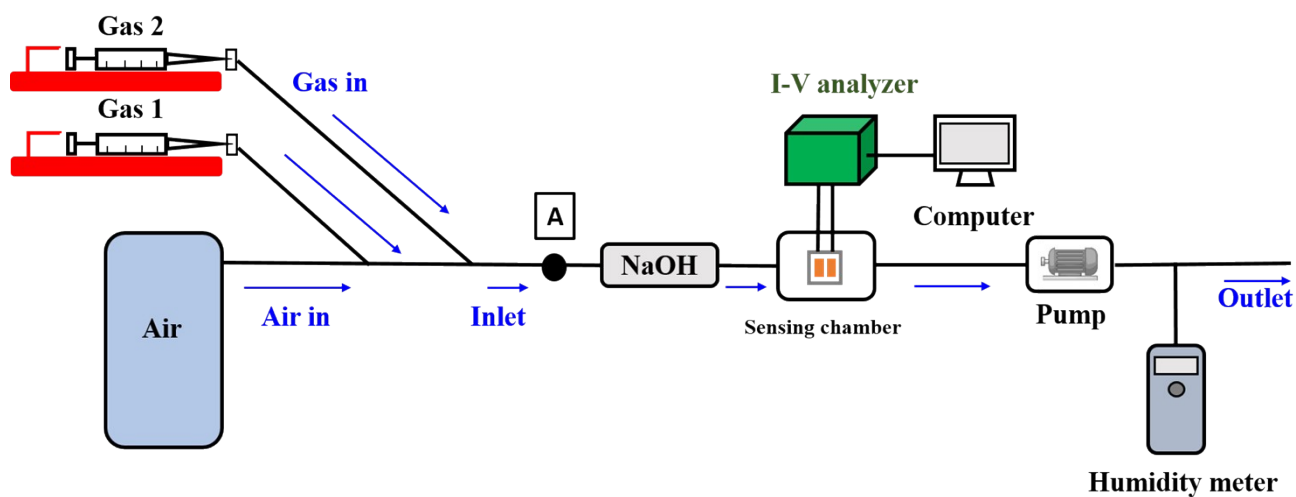

Figure S2. The gas sensing system with the mixture sensing setup (two analytes, Gas 1 and Gas 2) at fixed humidity (RH = 11%).

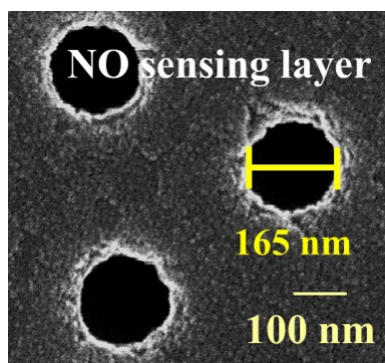

Figure S3. SEM image of the nano-porous structure before depositing the sensing layer

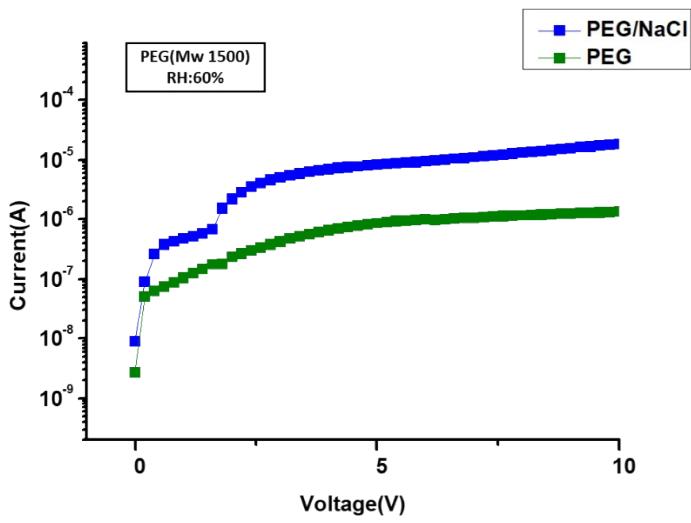

Figure S4. The current-voltage plot of Mw 1500 PEG sensor with and without adding NaCl

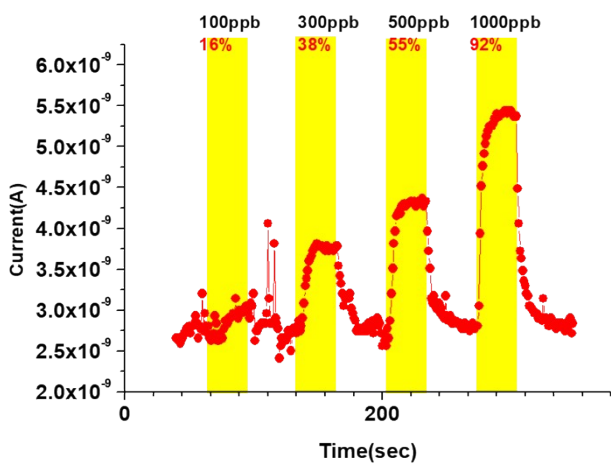

Figure S5. The real-time sensing response of the Mw 10000 PVA sensor to ammonia with different concentrations when RH = 53%

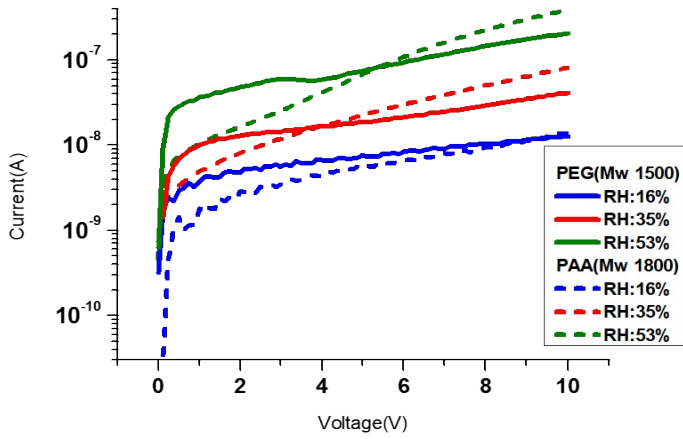

Figure S6. The I-V curves of the Mw 1800 PAA sensor with Mw 1500 PEG sensor

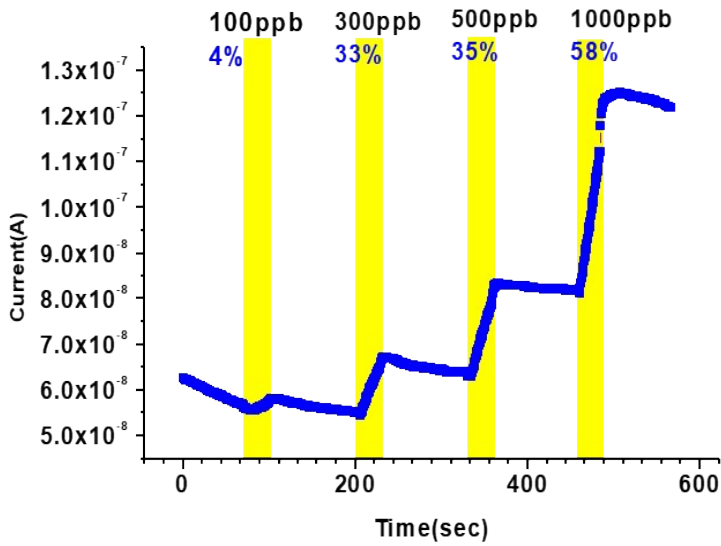

Figure S7. The real-time response of the Mw 1800 PAA sensor to ammonia with different concentrations

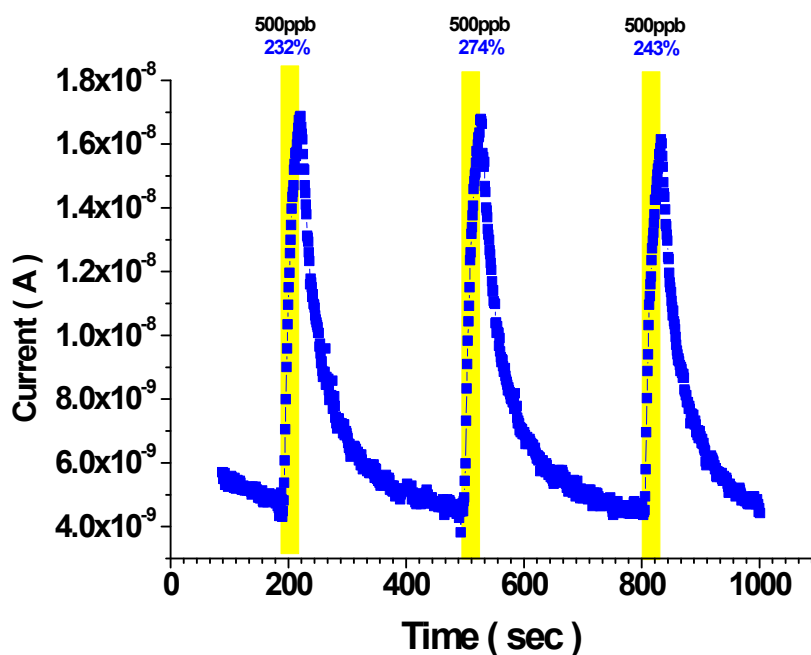

Figure S8. The real-time current tracking measurement when using Glycerol/PEG *Nano Sponge* sensor to repeatedly detect 500 ppb ammonia in the fixed humidity sensing system.

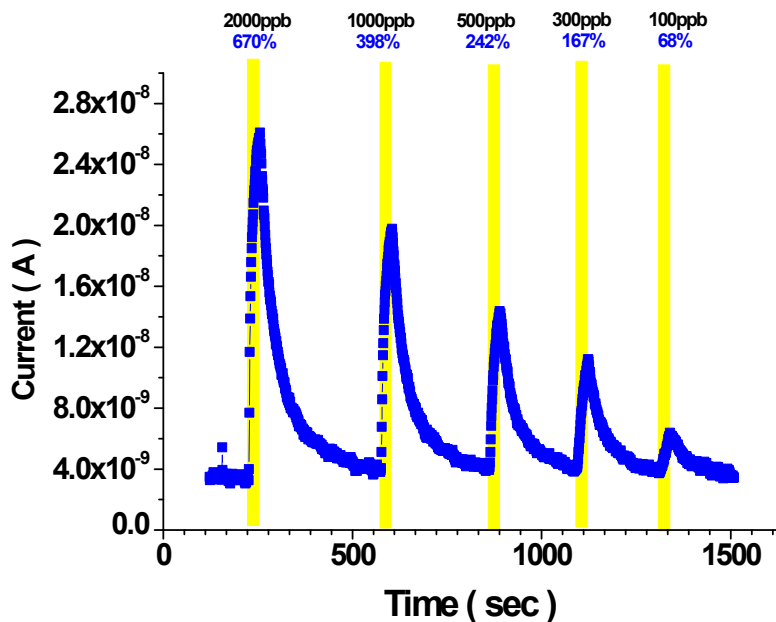

Figure S9. Real-time current tracking measurement when using Glycerol/PEG *Nano Sponge* sensor to detect ammonia from 100 ppb to 2000 ppb in the fixed humidity sensing system.

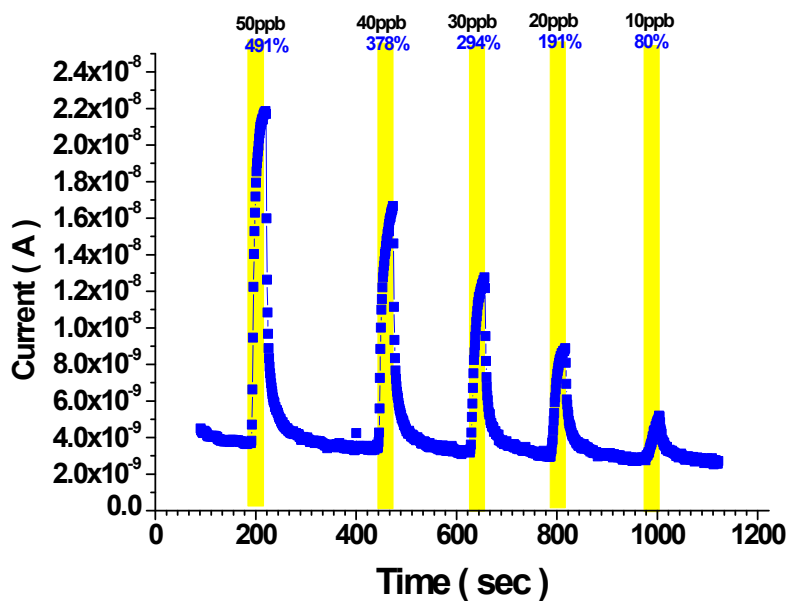

Figure S10. Real-time current tracking measurement when using Glycerol/PEG *Nano Sponge* sensor to detect ammonia from 10 ppb to 50 ppb in the modulated humidity sensing system without the NaOH tube.

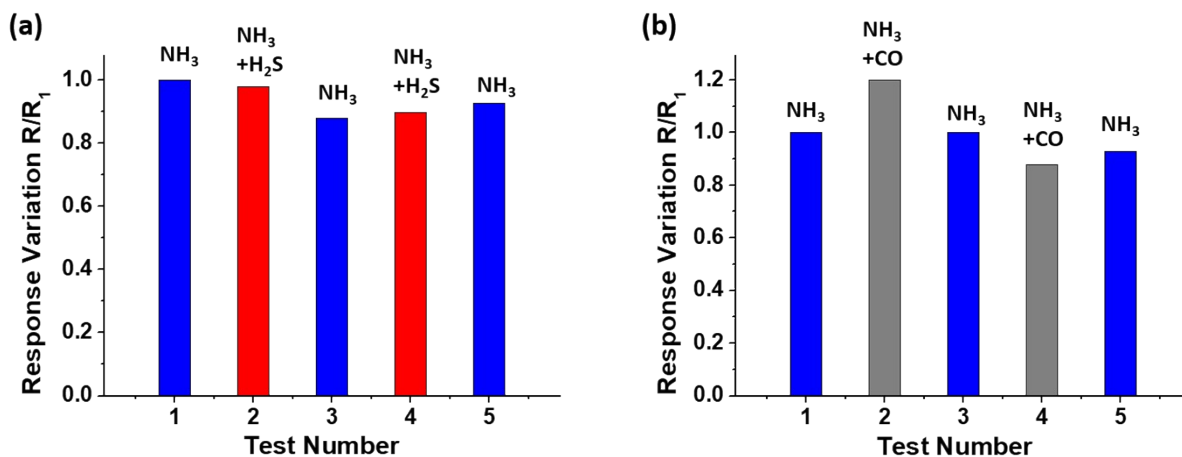

Figure S11. The normalized response plotted versus the test number when using Glycerol/PEG *Nano Sponge* sensor in the fixed humidity sensing system to detect the mixed gas effect when switching the analytes (a) between 500-ppb  $NH_3$  and 500-ppb  $NH_3$  with 1-ppm  $H_2S$  or (b) between 500-ppb  $NH_3$  and 500-ppb  $NH_3$  with 2.5-ppm  $CO$ .  $R_1$  represents the response in the 1<sup>st</sup> time measurement.



**Table S1 Comparison of ammonia sensor performance in recent reports using various materials.**

| Material                    | Material detail                    | Structure              | Sensing Range   | Response Time | Selectivity                                                                                                            | Ref. |
|-----------------------------|------------------------------------|------------------------|-----------------|---------------|------------------------------------------------------------------------------------------------------------------------|------|
| Organic Semiconductor (OSC) | DPP <sub>2</sub> T-TT              | Transistor             | 10 ppb ~ 10 ppm | < 1 min       | Good among ACE, Hexane, and Ethanol                                                                                    | [14] |
|                             | DNTT                               | Chemiresistor          | 10 ~ 100 ppb    |               | Good among ACE, EtOH, H <sub>2</sub> , O <sub>2</sub> , and NO                                                         | [15] |
|                             | TFB                                | Vertical Chemiresistor | 100 ppb ~ 1 ppm | < 1 min       | Good among ACE, NO, Ethanol, CO <sub>2</sub> , and Isoprene                                                            | [17] |
|                             | DNTT                               | Transistor             | 0.5 ~ 10 ppm    | 1~5 mins      | Good among HCL, H <sub>2</sub> O <sub>2</sub> , Hexane, DMMP, DMC, CHCl <sub>3</sub> , ACE, EtOH, and H <sub>2</sub> O | [18] |
|                             | P3HT                               | Transistor             | 10 ppb ~ 25 ppm |               | N/A                                                                                                                    | [20] |
|                             | PBDTTT-C-T / P3HT                  | Vertical Chemiresistor | 100 ~ 5600 ppb  |               | Good among CO, NO, ACE                                                                                                 | [21] |
| rGO                         | rGO-Co <sub>3</sub> O <sub>4</sub> | Chemiresistor          | 5 ~ 100 ppm     | < 1 min       | Good among Methanol, Benzene, Methylbenzene, Formaldehyde, ACE, Ethanol                                                | [24] |

|                      |                         |                        |                  |          |                                                                                                                           |      |
|----------------------|-------------------------|------------------------|------------------|----------|---------------------------------------------------------------------------------------------------------------------------|------|
|                      | Co porphyrin / graphene | Chemiresistor          | 100 ~ 7000 ppb   | > 5 mins | N/A                                                                                                                       | [25] |
|                      | rGO                     | Chemiresistor          | 1 ppb ~ 50 ppm   | < 1 min  | Poor                                                                                                                      | [26] |
|                      | PANI* / rGO-PANI        | network structure film | 100 ~ 5000 ppb   | < 1 min  | Good among ACE, Methanol, Ethanol, Glycol, Isopropanol, Dichloromethane, and Acetic acid                                  | [27] |
| CNT                  | CNT                     | Chemiresistor          | 10 ~ 75 ppm      |          | N/A                                                                                                                       | [34] |
|                      | CNTs/PANI               |                        | 20 ~ 100 ppm     | < 1 min  | Good among ACE, Methanol, Ethanol, Xylene, Isopropanol, Toluene, Chloroform, Benzene, and n-Butanol                       | [37] |
| 2D                   | Au-MoSe <sub>2</sub>    | Chemiresistor          | 10 ~ 100 ppm     | < 1 min  | Good among Formaldehyde, Benzene, ACE, and CO                                                                             | [38] |
|                      | NDI**                   | Transistor             | 10 ppb ~ 100 ppm |          | N/A                                                                                                                       | [39] |
| Electrochemical type | Ionic liquid            | Chemiresistor          | 5 ~ 25 ppm       | < 1 min  | Good among NO, NO <sub>2</sub> , CO, C <sub>2</sub> H <sub>5</sub> OH, H <sub>2</sub> , and C <sub>3</sub> H <sub>6</sub> | [40] |

|             |                      |                               |                     |                   |                                                   |                  |
|-------------|----------------------|-------------------------------|---------------------|-------------------|---------------------------------------------------|------------------|
|             | La gallate           | Chemiresistor                 | 3 ~ 40 ppm          | < 1 min           | N/A                                               | [41]             |
| Hygroscopic | Hydrogel             | Chemiresistor                 | 5-50 ppm            | 1~5 mins          | Good Response to 0.5-5 ppm NO <sub>2</sub>        | [31]             |
|             | <b>Glycerol/ PEG</b> | <b>Vertical chemiresistor</b> | <b>5 - 2000 ppb</b> | <b>&lt; 1 min</b> | <b>Good among H<sub>2</sub>S, CO, NO, and ACE</b> | <b>This work</b> |

\*PANI: polyaniline

\*\*NDI: NDI3HU-DTYM2

**Table S2.** The solubility and dissociation constant of NH<sub>3</sub>, H<sub>2</sub>S, CO, NO, and acetone.

| <b>Gas</b>                                          | <b>NH<sub>3</sub></b>        | <b>H<sub>2</sub>S</b>        | <b>CO</b>                    | <b>NO</b>     | <b>Acetone</b> |
|-----------------------------------------------------|------------------------------|------------------------------|------------------------------|---------------|----------------|
| <b>Solubility(g/100g)</b>                           | <b>56</b>                    | <b>0.33</b>                  | <b>0.0026</b>                | <b>0.0056</b> | <b>N/A</b>     |
| <b>Dissociation constant</b>                        | <b>1.8 x 10<sup>-5</sup></b> | <b>6.3 x 10<sup>-8</sup></b> | <b>4.3 x 10<sup>-7</sup></b> | <b>N/A</b>    | <b>N/A</b>     |
| <b>* Response (%)<br/>in Mw 1500 PEG<br/>sensor</b> | <b>533</b>                   | <b>19</b>                    | <b>23</b>                    | <b>9</b>      | <b>0</b>       |

\*The response (%) of Mw 1500 PEG sensor to 1-ppm NH<sub>3</sub>, H<sub>2</sub>S, CO, NO, and acetone are listed.

The measurement was in the modulated humidity sensing system (without NaOH tube) when RH = 53%.
